# Supplementary material for: Characterization of the Pseudomonas aeruginosa metalloendopeptidase, Mep72, a member of the Vfr regulon
Source: PubMed Central journal article supplement (PMC4222646; doi:10.1186/1471-2180-13-269), 2013-11-27
Supplement: 1471-2180-13-269-S1.pdf [file 1471-2180-13-269-S1.pdf]

## Additional file 1 - Oligonucleotides used in this study

| Primer Pairs                                            | Forward (5' - 3')        | Reverse (5' - 3')        |
|---------------------------------------------------------|--------------------------|--------------------------|
| <b>Gene expression</b>                                  |                          |                          |
| PA2782F/R                                               | GCCAGCACCCATAACAGC       | GGCGATGTCGTTCTCGTC       |
| PA2783F/R                                               | AATCCCTGCTCTGCTCCAC      | GTTGACGCCGCTCTTCTC       |
| <i>rpsL</i> F/R                                         | CCACCACGCCGAAAAA         | CGAACGACCCTGCTTACG       |
| <b>RT-PCR to confirm operon</b>                         |                          |                          |
| 2782F1/2782R1                                           | GCCAGCACCCATAACAGC       | GGCGATGTCGTTCTCGTC       |
| 2782F1/2783R2                                           | GCCAGCACCCATAACAGC       | GTTGACGCCGCTCTTCTC       |
| <b>Cloning PA2783</b>                                   |                          |                          |
| PA2783orf-F/<br>PA2783orf-R                             | CGAACACAGGCAACCCATGAAGAA | ACGAGGGAAACCGGAGTGATCATA |
| <b>Sequencing of <i>TnphoA</i> mutants</b>              |                          |                          |
| <i>TnphoA</i> -seq                                      | AGCCCGGTTTTCCAGAACAGG    |                          |
| <b>Probes for electrophoretic mobility shift assays</b> |                          |                          |
| Probe I-F/R                                             | GCCGGCGCGCGGCCTGGCGCAAAT | GTTGTTTCTCCTCTGAGTGAACG  |
| Probe II-F/R                                            | CTGGCGCAAATGTGA          | TGGCGCGGAGTCTAGGA        |
| Probe III-F/R                                           | GTGAACGGTTGCCGC          | TGGCGCGGAGTCTAGGA        |
| Probe IV-F/R                                            | CTGGCGCAAATGTGA          | GAAGAAGCCTCTCCCAGCG      |
| Probe V-F/R                                             | CTGGCGCAAATGTGA          | AGCCTCTCCCAGCGT          |
| Probe VI-F/R                                            | CTGGCGCAAATGTGA          | CAGCGTCCGCCGAACCGT       |
| Probe VII-F/R                                           | CTGGCGCAAATGTGA          | GGCGGCAACCGTTTCACATT     |
