# Supplementary material for: Characterization of the Pseudomonas aeruginosa metalloendopeptidase, Mep72, a member of the Vfr regulon
Source: PubMed Central journal article supplement (PMC4222646; doi:10.1186/1471-2180-13-269), 2013-11-27
Supplement: 1471-2180-13-269-S2.pdf [file 1471-2180-13-269-S2.pdf]

**Additional file 2 - Amino acid homology of the predicted PA2783 protein endopeptidase domain with other bacterial proteins**

| <b>Organism<br/>Accession Number</b>                             | <b>Protein</b>                                 | <b>Identity<br/>(%)</b> | <b>Similarity<br/>(%)</b> | <b>Gaps<br/>(%)</b> |
|------------------------------------------------------------------|------------------------------------------------|-------------------------|---------------------------|---------------------|
| <b><i>Homology across entire metalloendopeptidase domain</i></b> |                                                |                         |                           |                     |
| <i>Pseudomonas mendocina</i><br>YP_001189641.1 ymp               | CHO-binding CenC domain-<br>containing protein | 124/178<br>(70)         | 143/178<br>(80)           | 2/178<br>(1)        |
| <i>Hahella chejuensis</i><br>YP_433029.1 KTC 2396                | Ni,Fe-hydrogenase I small subunit              | 85/178<br>(48)          | 116/178<br>(65)           | 12/178<br>(7)       |
| <i>Agarivorans albus</i><br>WP_016400415.1 MKT 106               | Secreted trypsin-like serine<br>protease       | 85/178<br>(48)          | 104/178<br>(58)           | 18/178<br>(10)      |
| <b><i>Homology across conserved peptidase motif</i></b>          |                                                |                         |                           |                     |
| <i>Alteromonas macleodii</i><br>YP_006749171.1 ATCC27126         | Hypothetical protein                           | 16/22<br>(73)           | 17/22<br>(77)             | 0/22<br>(0)         |
| <i>Aeromonas hydrophila</i><br>YP_855156.1 ML09-119              | Hypothetical protein                           | 14/22<br>(64)           | 14/22<br>(64)             | 0/22<br>(0)         |
| <i>Aeromonas aquariorum</i><br>WP_010635185.1                    | Hypothetical protein                           | 14/22<br>(64)           | 14/22<br>(64)             | 0/22<br>(0)         |
| <i>Vibrio cholerae</i> O1<br>WP_000710201.1                      | Hypothetical protein                           | 14/22<br>(64)           | 17/22<br>(77)             | 0/22<br>(0)         |
| <i>Vibrio mimicus</i><br>WP_000710197.1 VM543                    | Hypothetical protein                           | 14/22<br>(64)           | 16/22<br>(73)             | 0/22<br>(0)         |
| <i>Vibrio vulnificus</i><br>WP_002810048.1 MO6-24/O              | Hypothetical protein                           | 14/22<br>(64)           | 17/22<br>(77)             | 0/22<br>(0)         |
| <i>Xanthomonas fragariae</i><br>WP_002810048.1 LMG 25863         | Hypothetical protein                           | 12/22<br>(54)           | 13/22<br>(59)             | 2/22<br>(9)         |
| <i>Xanthomonas campestris</i><br>M72.UPW<br>WP_010375553.1       | Peptidyl-Asp metalloendopeptidase              | 12/22<br>(54)           | 13/22<br>(59)             | 2/22<br>(9)         |
| <i>Xanthomonas vesicatoria</i><br>M72.UPW<br>WP_005991741.1      | Peptidyl-Asp metalloendopeptidase              | 12/22<br>(54)           | 13/22<br>(59)             | 2/22<br>(9)         |
