# Supplementary material for: Characterization of the Pseudomonas aeruginosa metalloendopeptidase, Mep72, a member of the Vfr regulon
Source: PubMed Central journal article supplement (PMC4222646; doi:10.1186/1471-2180-13-269), 2013-11-27
Supplement: 1471-2180-13-269-S4.pdf [file 1471-2180-13-269-S4.pdf]

**Additional file 4 - Amino acid homology of the predicted PA2783 protein carbohydrate-binding domains I and II with other bacterial proteins**

| Organism<br>Accession Number                             | Protein                                        | Identity<br>(%) | Similarity<br>(%) | Gaps<br>(%)    |
|----------------------------------------------------------|------------------------------------------------|-----------------|-------------------|----------------|
| <b><i>CHO-binding module domain I</i></b>                |                                                |                 |                   |                |
| <i>Pseudomonas mendocina</i><br>YP_001189641.1 ymp       | CHO-binding CenC domain-<br>containing protein | 80/131<br>(60)  | 93/131<br>(71)    | 1/131<br>(0.7) |
| <i>Hahella chejuensis</i><br>YP_433029.1 KTC 2396        | Ni,Fe-hydrogenase I small subunit              | 35/131<br>(27)  | 60/131<br>(46)    | 4/131<br>(3)   |
| <i>Paenibacillus mucilaginosus</i><br>YP_006190919.1 K02 | Endo-1,4-beta-xylanase                         | 37/131<br>(27)  | 60/131<br>(46)    | 4/131<br>(3)   |
| <i>Pseudomonas fluorescens</i><br>WP_003193107.1 SS101   | Copper oxidase                                 | 38/131<br>(29)  | 59/31<br>(45)     | 16/102<br>(12) |
| <b>Cdd: CBM_4_9 pfam02018</b>                            | CHO-binding module                             | 33/131<br>(25)  | 51/131<br>(39)    | 6/131<br>(5)   |
| <b><i>CHO-binding module domain II</i></b>               |                                                |                 |                   |                |
| <i>Pseudomonas mendocina</i><br>YP_001189641.1           | CHO-binding CenC domain-<br>containing protein | 69/126<br>(55)  | 87/126<br>(69)    | 2/126<br>(1.5) |
| <i>Hahella chejuensis</i><br>YP_433029.1                 | Ni,Fe-hydrogenase I small subunit              | 38/126<br>(30)  | 62/126<br>(49)    | 7/126<br>(5.5) |
| <i>Cellulosilyticum lentocellum</i> *<br>YP_004307454.1  | Endo-1,4-beta-xylanase (aa 34-173)             | 32/126<br>(25)  | 53/126<br>(42)    | 9/126<br>(7)   |
| <i>Cellulosilyticum lentocellum</i> *<br>YP_004307454.1  | Endo-1,4-beta-xylanase (aa 190-314)            | 34/126<br>(27)  | 46/126<br>(36)    | 20/126<br>(16) |
| <b>Cdd: CBM_4_9 pfam02018</b>                            | CHO-binding module                             | 39/126<br>(31)  | 47/126<br>(37)    | 11/126<br>(9)  |

\*Previously *Clostridium lentocellum*
